# Supplementary material for: Factor VIIa Regulates the Level of Cell-Surface Tissue Factor through Separate but Cooperative Mechanisms
Source: MDPI journal article supplement (doi:10.3390/cancers13153718), 2021-07-23
Supplement: s1 [file s1]

# Supplementary Material: Factor VIIa Regulates the Level of Cell-Surface Tissue Factor through Separate but Cooperative Mechanisms

Yahya Madkhali, Araci MR Rondon, Sophie Featherby, Anthony Maraveyas, John Greenman and Camille Ettelaie

A)

BxPC-3 cells

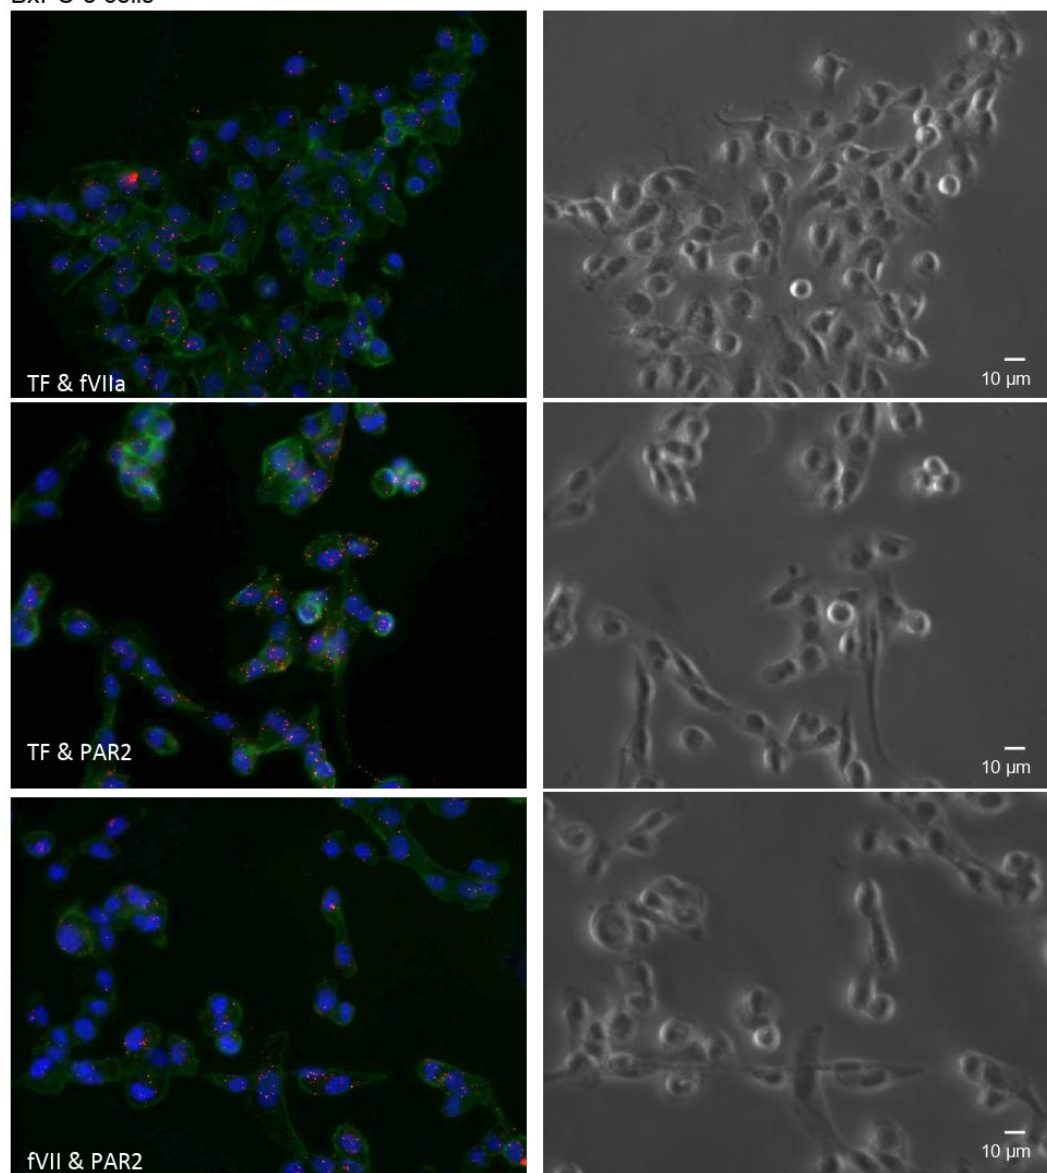

## 786-O cells

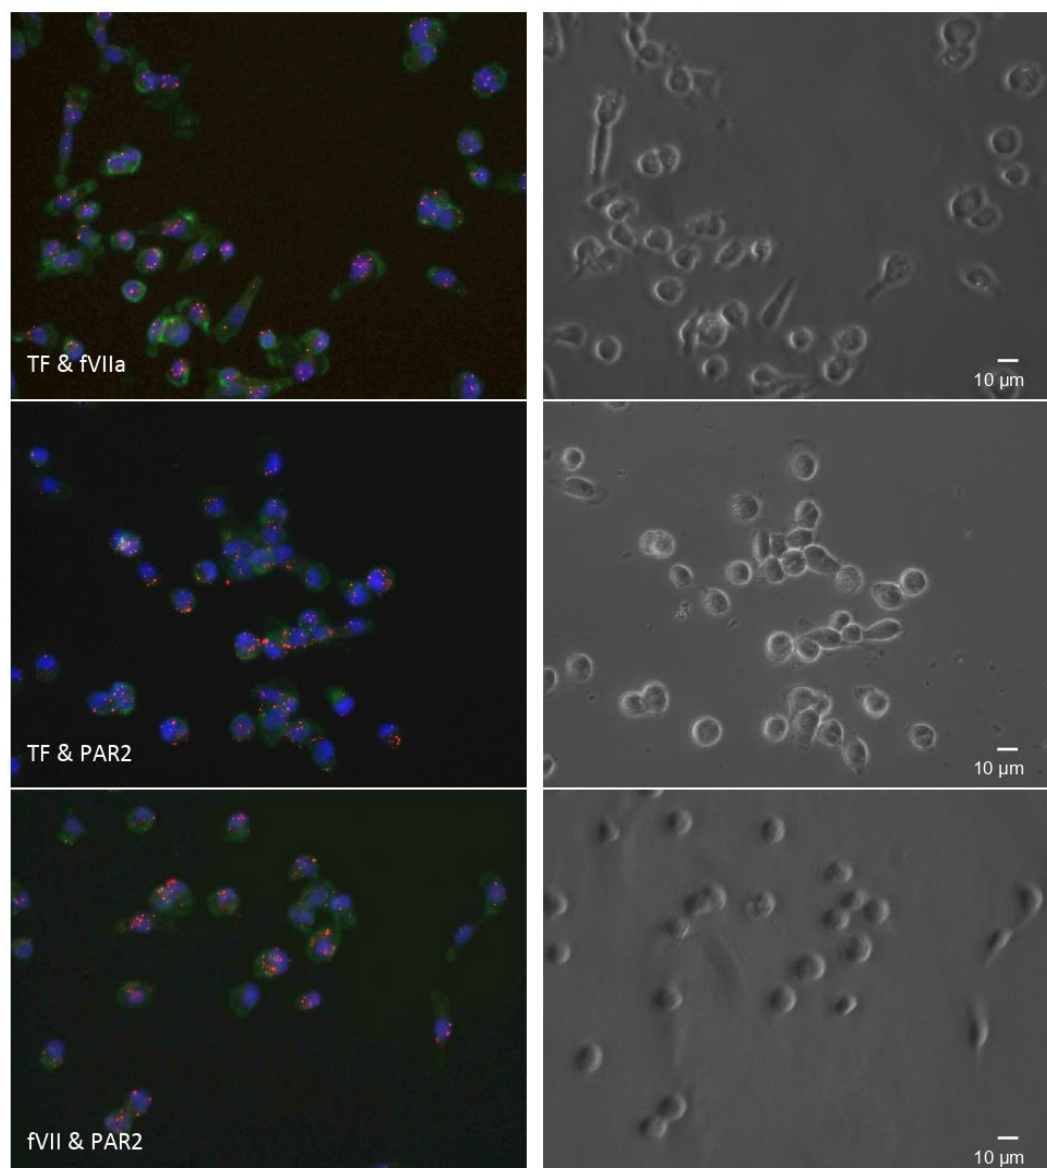

## B)

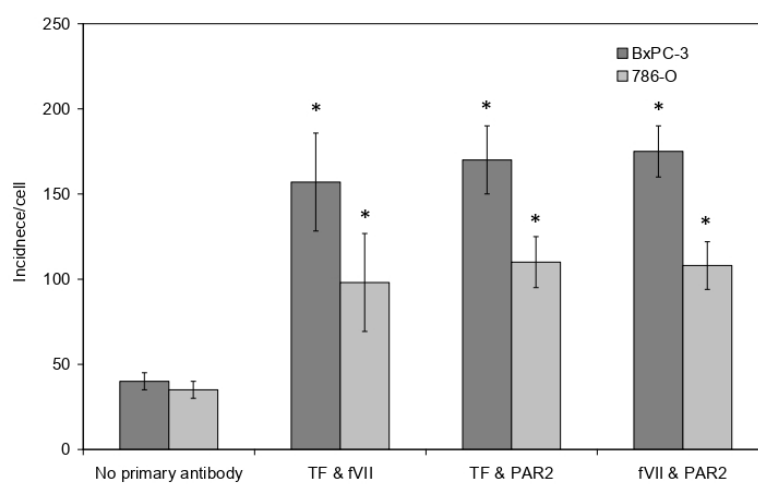

**Figure S1.** Analysis of the association of TF, fVIIa and PAR2 in BxPC-3 and 786-O cell lines using the proximity ligation assay. BxPC-3 and 786-O cells ( $10^3$ ) were seeded out into 35 mm-glass based  $\mu$ -dishes overnight. Cells were then fixed with 4% (v/v) paraformaldehyde for 15 min, washed three times with PBS for 5 min and blocked with Duolink blocking buffer for 1 h. The cells were then incubated overnight at 4°C with combinations of antibodies as follows. The cells were probed with a mouse anti-fVII antibody (321621; 10  $\mu$ g/ml) together with a rabbit anti-TF antibody (FL295; 5  $\mu$ g/ml) to examine the interaction between fVII and TF. Another set of cells were probed with a rabbit anti-TF antibody (FL295; 5  $\mu$ g/ml) and a mouse anti-PAR2 antibody (SAM11; 20  $\mu$ g/ml) to examine the association of TF and PAR2 proteins. Finally, to test the proximity between fVII and PAR2, the cells were probed with a polyclonal rabbit anti-fVII antibody (10  $\mu$ g/ml) together with mouse anti-PAR2 antibody (SAM11). (A) The dishes were washed three times with PBS and PLA performed according to the manufacturer's instructions. The cells were stained with DAPI (2  $\mu$ g/ml) and Phalloidin-FITC (2  $\mu$ g/ml). Images were acquired using a Zeiss Axio Vert.A1 inverted fluorescence microscope with a  $\times 40$  magnification. (B) The number of red fluorescent events and nuclei were determined as incidence/cell in 10 fields of view from each assay using the ImageJ program. ( $n = 4$ ;  $* = p < 0.05$  vs the control).

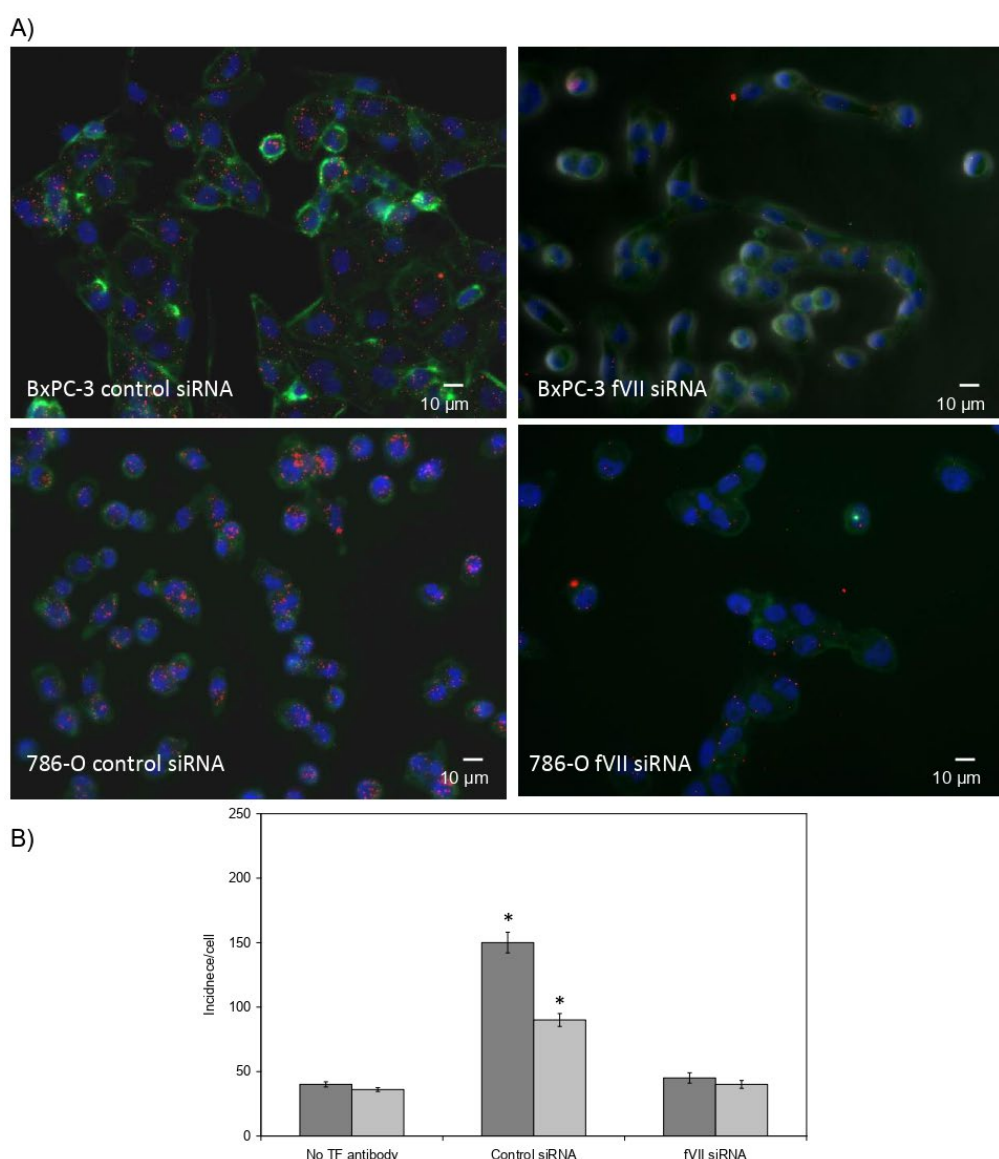

**Figure S2.** Analysis of the association of TF and PAR2 in the presence and absence of fVIIa. Sets of BxPC-3 and 786-O cells ( $10^3$ ) were seeded out into 35 mm-glass based  $\mu$ -dishes and transfected with a set of Silencer Select Pre-designed siRNA specific for the coagulation factor VII or a control siRNA (200 nM) and incubated for 48 h at 37°C. All cells were then fixed and blocked and then incubated overnight at 4°C with a rabbit anti-TF antibody (FL295; 5  $\mu$ g/ml) and a mouse anti-PAR2 antibody (SAM11; 20  $\mu$ g/ml). (A) The dishes were washed and PLA performed. The cells were stained with DAPI (2  $\mu$ g/ml) and images were acquired at  $\times 40$  magnification. (B) The number of red fluorescent events and nuclei were determined as incidence/cell in 10 fields of view from each assay using the ImageJ program. ( $n = 3$ ;  $* = p < 0.05$  vs Sample containing control siRNA).

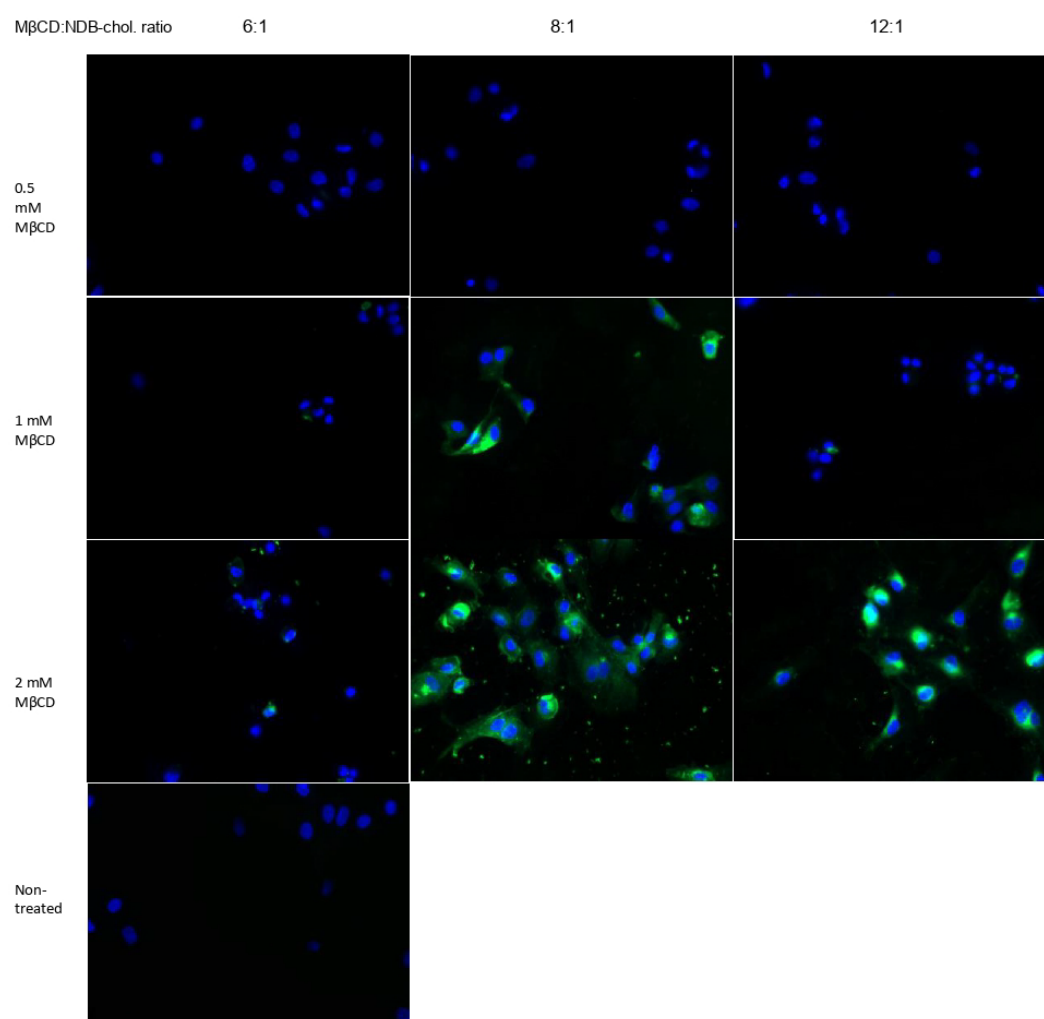

**Figure S3.** Optimisation of the labelling of HCAEC membrane using NBD-cholesterol. The membrane-associated cholesterol was replaced with 3-dodecanoyl-NBD cholesterol using M $\beta$ CD, in order to visualise lipid rafts by fluorescence microscopy (Ext. 465 nm, Em. 535 nm). HDBEC ( $10^3$ ) were seeded into 35 mm glass bottom dishes and permitted to adhere. Enrichment of the cell membranes was carried out using a range of M $\beta$ CD (0.5–2 mM) and any influence on cell viability determined separately. Labelling was then carried out with combinations of M $\beta$ CD:NBD-cholesterol complex at molar ratios of 6:1, 8:1 and 12:1, by incubation for 1 h at 37°C. The cells were finally washed twice with PBS and visualized using a fluorescence microscope with a  $\times 40$  magnification. Key: Green = NBD cholesterol; Blue = DAPI.

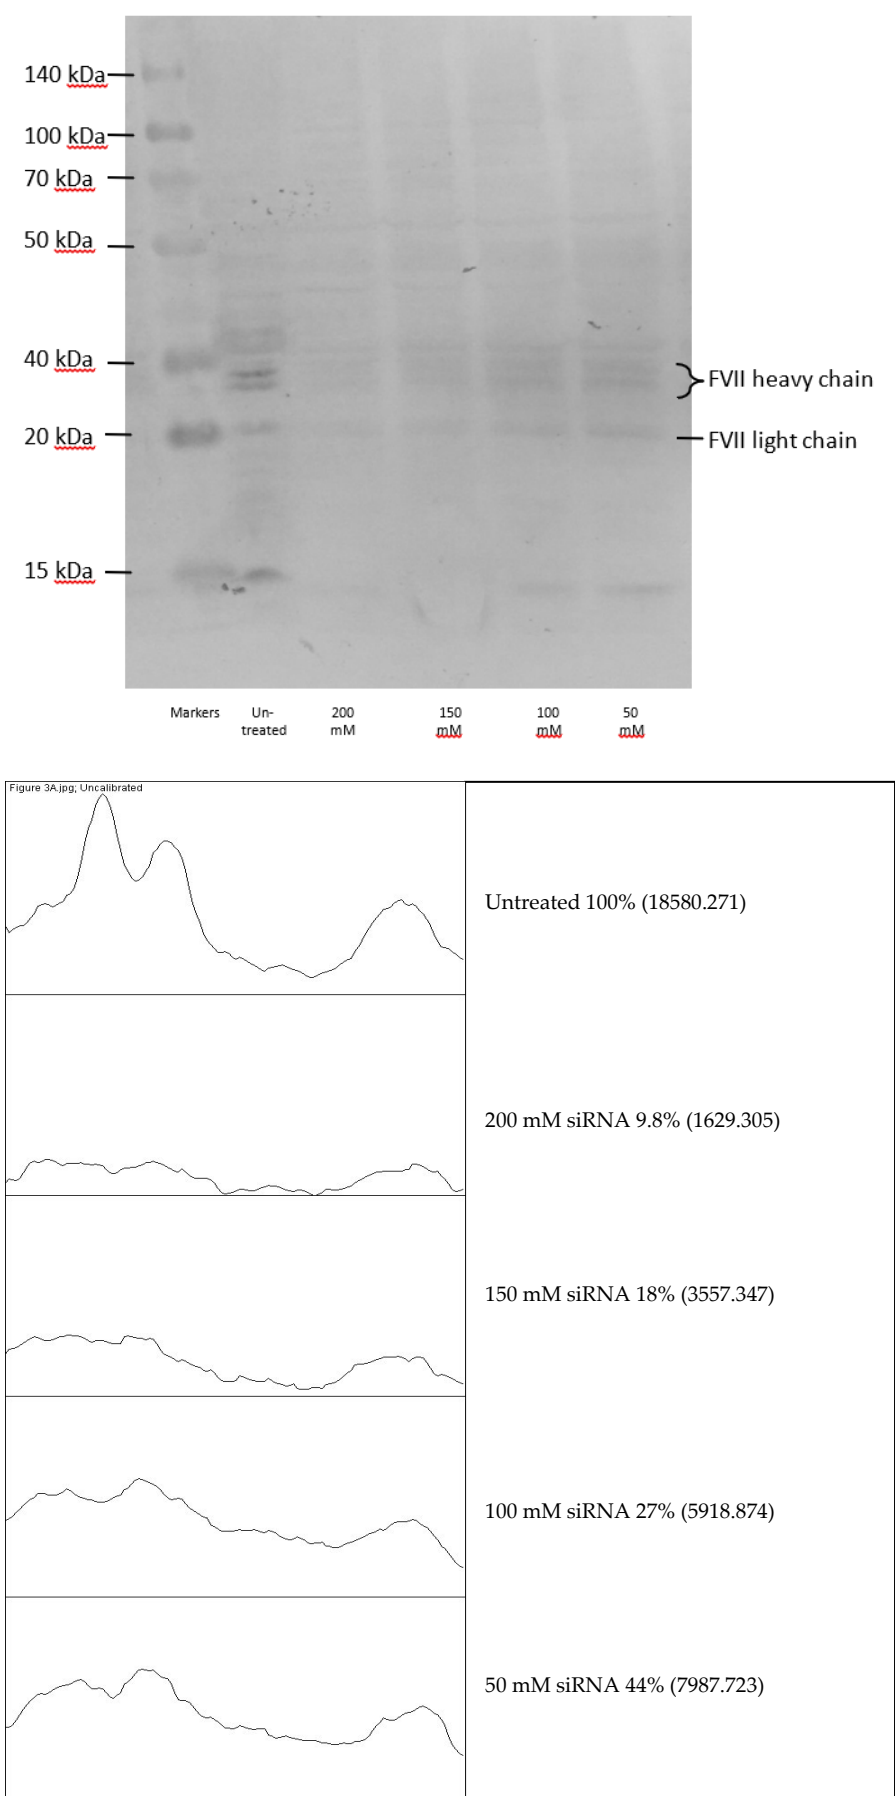

Figure S4. Uncropped original western blot.
